# Supplementary material for: Doxorubicin- and Trastuzumab-Modified Gold Nanoparticles as Potential Multimodal Agents for Targeted Therapy of HER2+ Cancers
Source: MDPI journal article supplement (doi:10.3390/molecules28062451), 2023-03-07
Supplement: s1 [file s1]

# Doxorubicin- and Trastuzumab-Modified Gold Nanoparticles as Potential Multimodal Agents for Targeted Therapy of HER2+ Cancers

Kinga Żelechowska-Matysiak <sup>1</sup>, Kamil Wawrowicz <sup>1</sup>, Mateusz Wierzbicki <sup>2</sup>, Tadeusz Budlewski <sup>3</sup>, Aleksander Bilewicz <sup>1</sup> and Agnieszka Majkowska-Pilip <sup>1,3,\*</sup>

<sup>1</sup> Centre of Radiochemistry and Nuclear Chemistry, Institute of Nuclear Chemistry and Technology, 03-195 Warsaw, Poland

<sup>2</sup> Department of Nanobiotechnology, Institute of Biology, Warsaw University of Life Sciences, 02-787 Warsaw, Poland

<sup>3</sup> Isotope Therapy Department, Central Clinical Hospital of the Ministry of Interior and Administration, 02-507 Warsaw, Poland

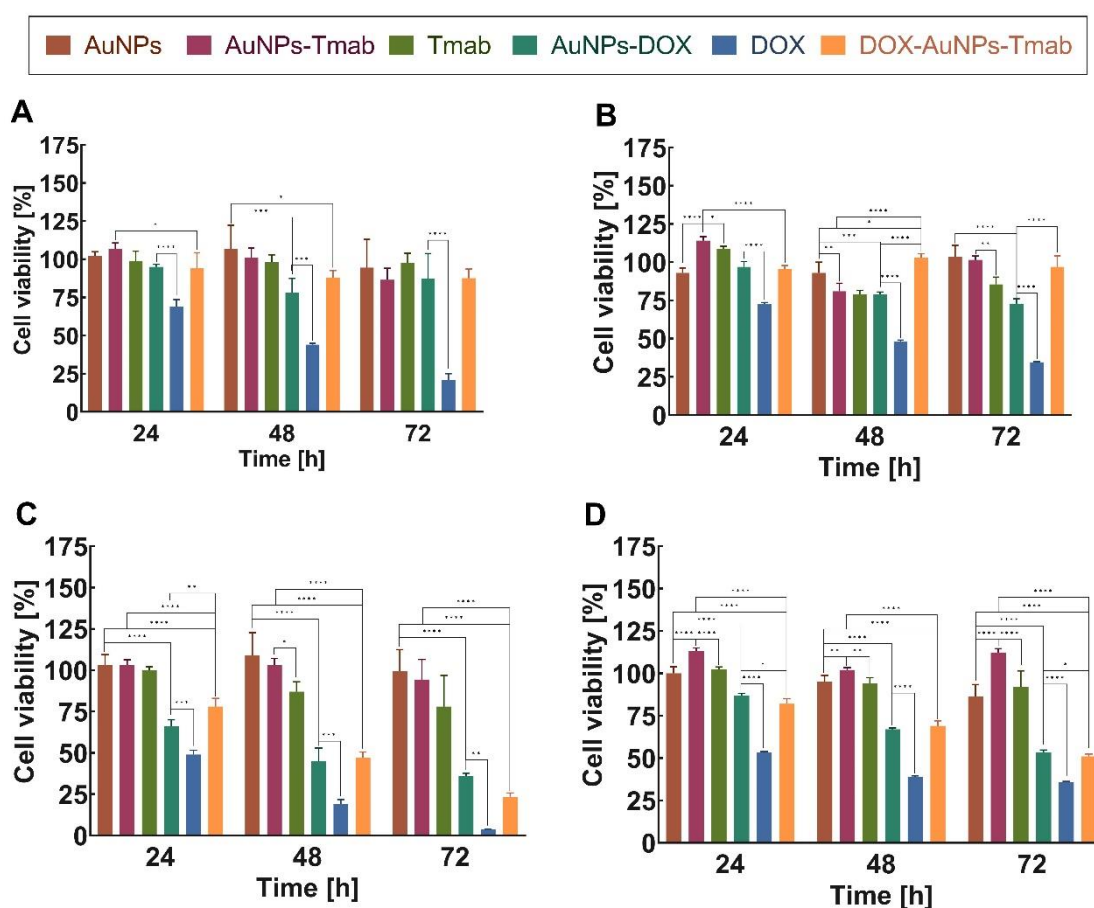

**Figure S1.** Metabolic activity of SKOV-3 (A, C) and MDA-MB-231 (B, D) cells after treatment with AuNPs, AuNPs-Tmab, Tmab, AuNPs-DOX, DOX, DOX-AuNPs-Tmab. DOX concentrations are 2 µg/mL (A, B) and 15 µg/mL (C, D). Cells were incubated for 24 h, 48 h and 72 h and then the MTS assay was performed. Untreated cells were used as control (100% viability). Statistics were performed using one-way ANOVA test comparing AuNPs together with nanoparticles with doxorubicin and/or trastuzumab attached, and AuNPs-Tmab was compared with Tmab/DOX-AuNPs-Tmab and AuNPs-DOX vs. DOX/DOX-AuNPs-Tmab. Summarized data represented results from four replicates (n = 4; mean ± SD) and were considered significant if  $p \leq 0.01$  (\*\*),  $p \leq 0.001$  (\*\*\*),  $p \leq 0.0001$  (\*\*\*\*).

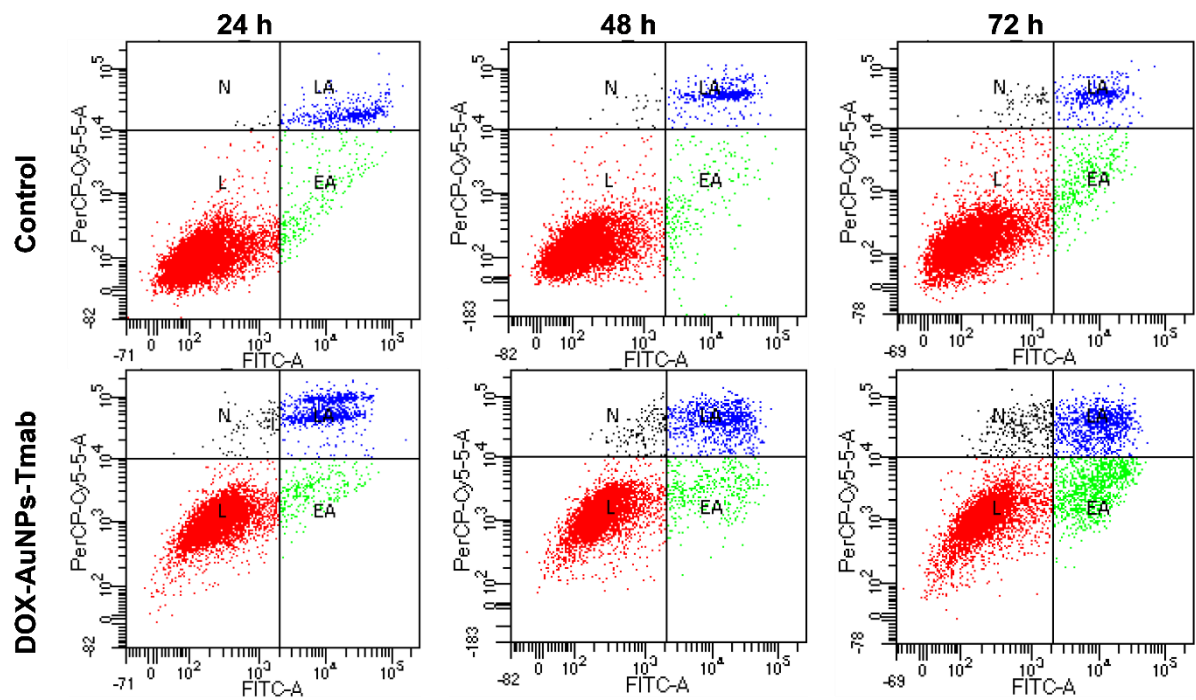

**Figure S2.** Representative graphs of apoptosis analysis results for the control group and for cells treated with DOX-AuNPs-Tmab after 24 h, 48 h and 72 h. DOX concentration is 7  $\mu$ g/mL.

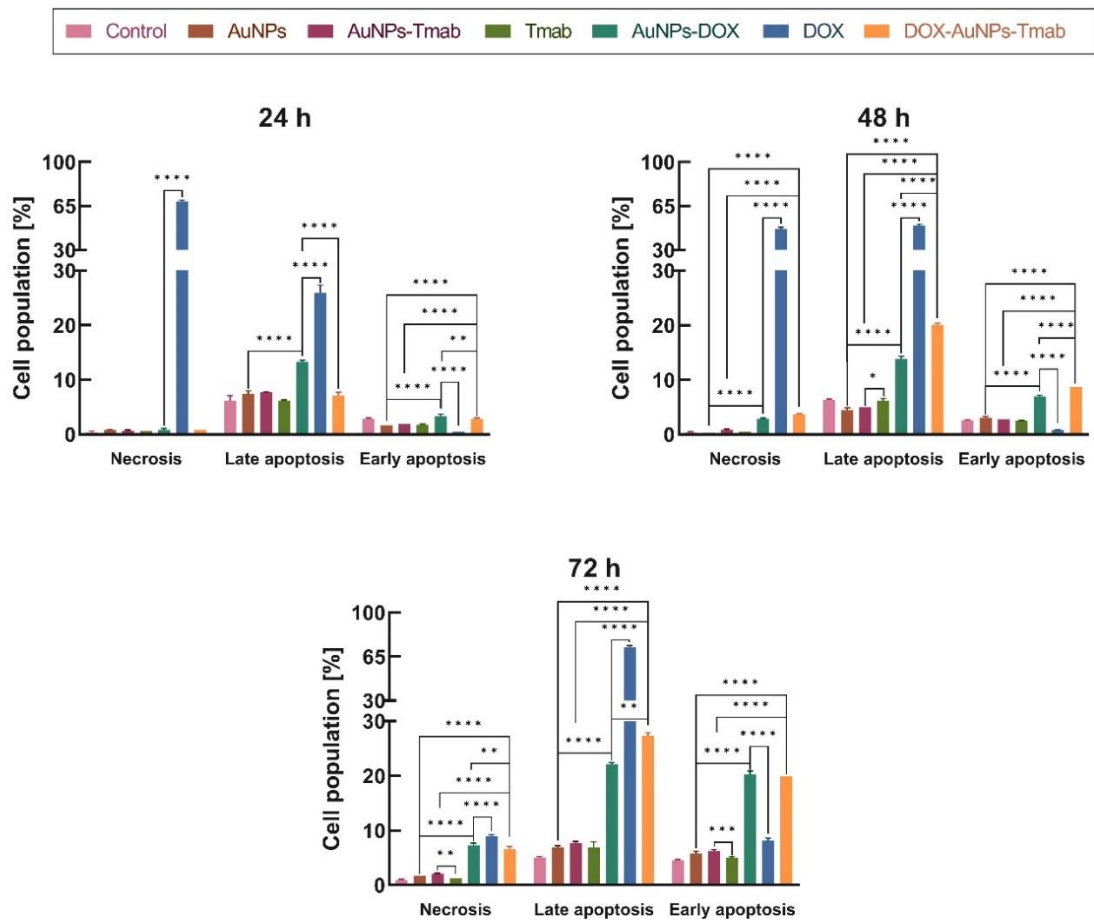

**Figure S3.** Distribution of SKOV-3 cell populations (necrosis, late and early apoptosis) treated with AuNPs, AuNPs-Tmab, Tmab, AuNPs-DOX, DOX, and DOX-AuNPs-Tmab after 24 h, 48 h and 72 h.

Data are presented from four replicates ( $n = 4$ , mean  $\pm$  SD). DOX concentration is 15  $\mu\text{g/mL}$ . Untreated cells were used as control, while statistics (one-way ANOVA test) were performed similarly as in the case of cytotoxicity studies with the use of MTS assay (Figure S1). Statistical significance was considered significant if  $p \leq 0.05$  (\*),  $p \leq 0.01$  (\*\*),  $p \leq 0.001$  (\*\*\*),  $p \leq 0.0001$  (\*\*\*\*).

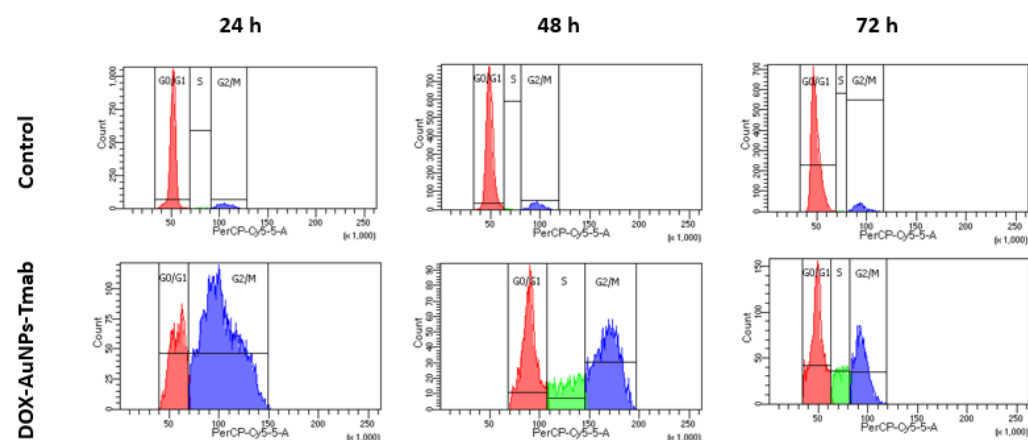

**Figure S4.** Representative graphs of cell cycle analysis results for the control group and DOX-AuNPs-Tmab cell treatment after 24 h, 48 h and 72 h. DOX concentration is 7  $\mu\text{g/mL}$ .

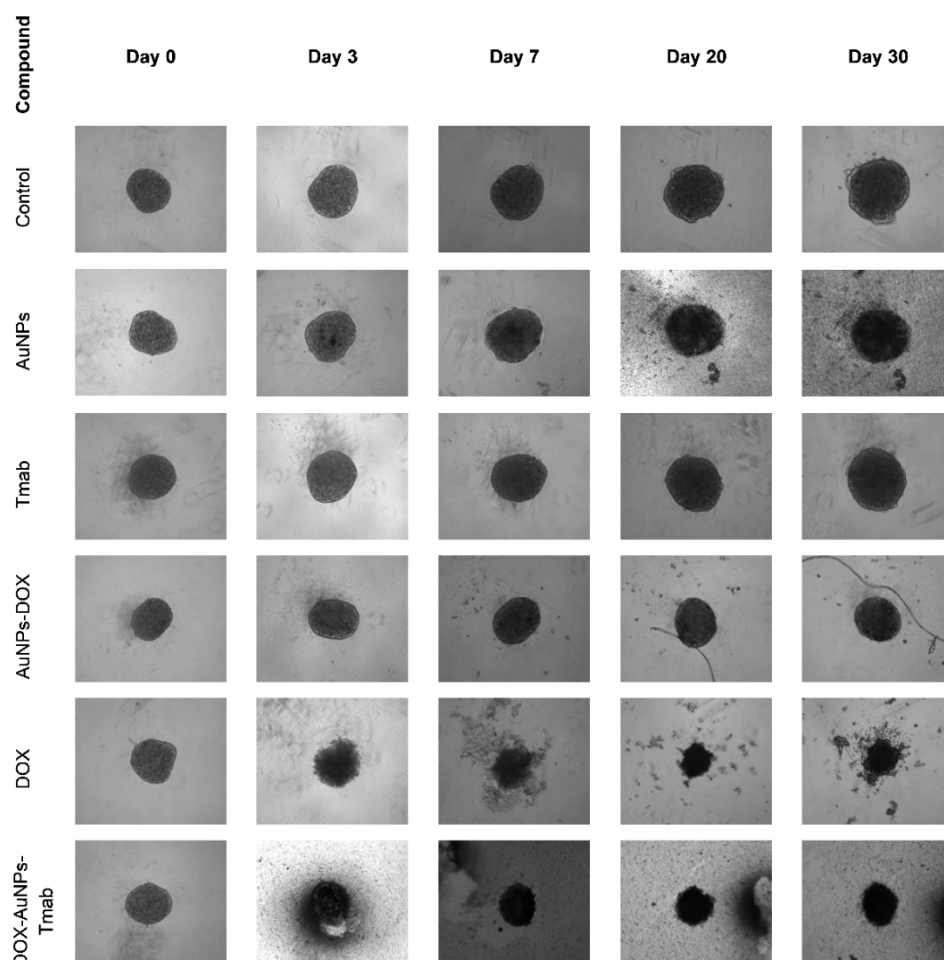

**Figure S5.** Microscopic images showing the morphology of control and compound-treated SKOV-3 spheroids on several selected measurement days.
